# Supplementary material for: The ShcD signaling adaptor facilitates ligand-independent phosphorylation of the EGF receptor
Source: PubMed Central journal article supplement — Mol Biol Cell. 2014 Mar 15;25(6):739–52. doi: 10.1091/mbc.E13-08-0434 (PMC3952845; doi:10.1091/mbc.e13-08-0434), 2014-03-15

# Supplemental Materials

*Molecular Biology of the Cell*

Wills et al.

## Supplemental Figures

**Fig. S1.** Anti-pEGFR Y1068 antibody detects only the phosphorylated form of the EGFR protein. The specificity and cross reactivity of an antibody raised against EGFR phospho-tyrosine Y1068 was evaluated by immunoblot and immunofluorescence. (A) Lysate collected from unstimulated (T=0) and 50 ng/ml EGF-stimulated (T=10) COS-1 cells was immunoblotted for EGFR pTyr1068. (B) When ShcD-GFP transfected cells were exposed to EGF and visualized by confocal microscopy, robust pY1068 fluorescence was observed. Conversely, introduction of ShcD and a constitutively active kinase binding partner into HEK 293T cells, which do not express endogenous EGFR, failed to elicit a pEGFR signal.

Fig. S2. ShcD-induced EGFR phosphorylation is comparable in COS-1 and HEK-293 cells. The capacity of COS-1 to activate endogenous EGFR in the presence of ShcD was compared to the response of HEK 293 cells overexpressing both EGFR and ShcD. Total protein levels were equalized prior to loading.

**Fig. S3.** MS/MS spectra for all EGFR phospho-tyrosine peptides. The MS/MS database search and software/method used to evaluate site assignment were described in experimental section. The peptide sequence, the precursor m/z and charge observed, and the score/E-value for the peptide were all listed in supplementary Table 2.

## Supplemental Tables

**Table S1.** Co-localization of ShcD (green) and pEGFR (red) signals expressed as Pearson's correlation coefficient, with comparison to van Steensel randomized signal.

| Transfection | Time (min) | Pearson's R | Van Steensel x-Translation |                    |
|--------------|------------|-------------|----------------------------|--------------------|
|              |            |             | R(rand) mean +/- SD        | R(Obs) > R(rand) % |
| ShcD-GFP     | T = 0      | 0.790       | 0.488 +/- 0.162            | 95.10%             |
| ShcD-GFP     | T = 60     | 0.820       | 0.552 +/- 0.138            | 97.60%             |
| ShcD-GFP     | T = 120    | 0.855       | 0.551 +/- 0.113            | 97.60%             |
| GFP          | T = 10     | 0.147       | 0.139 +/- 0.009            | 80.50%             |

**Table S2.** MS information for EGFR phosphopeptides.

| EGFR Peptide Sequence*                        | p-Tyr sites | SEQUEST XCorr score | X!Tandem - log(e) | Observed m/z | Charge (e) |
|-----------------------------------------------|-------------|---------------------|-------------------|--------------|------------|
| (R)YSSDPTGALTEDSIDDTFL<br>PVPEyINQSVPK(R)     | <b>1068</b> | <b>3.8</b>          | <b>8.1</b>        | 1160.210     | <b>3</b>   |
| (K)RPAGSVQNPV <sub>y</sub> HNQPLNP<br>APSR(D) | <b>1086</b> | <b>3.4</b>          | <b>11.7</b>       | 827.075      | <b>3</b>   |
| (K)GSHQISLDNPD <sub>y</sub> QQDFFP<br>K(E)    | <b>1148</b> | <b>6.0</b>          | <b>10.1</b>       | 1158.510     | <b>2</b>   |
| (K)GSTAENAE <sub>y</sub> LR(V)                | <b>1173</b> | <b>2.3</b>          | <b>8.8</b>        | 645.775      | <b>2</b>   |

Residues in parentheses are deduced, and shown to indicate the peptides as tryptic fragments. Phosphotyrosine is denoted by non-capital y.

**A**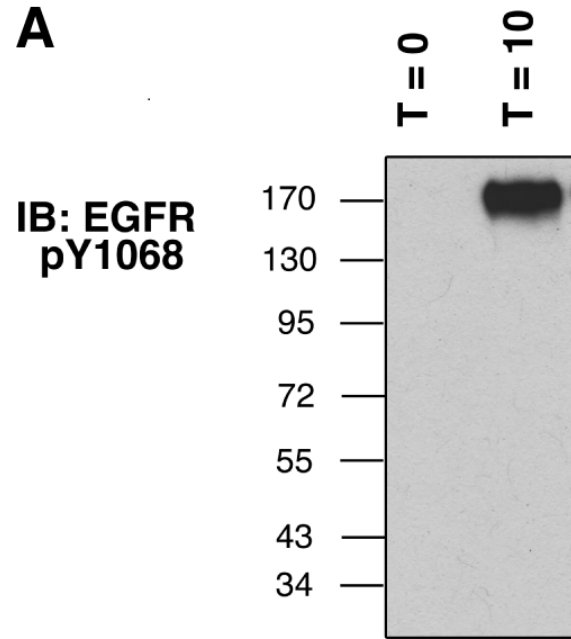**B**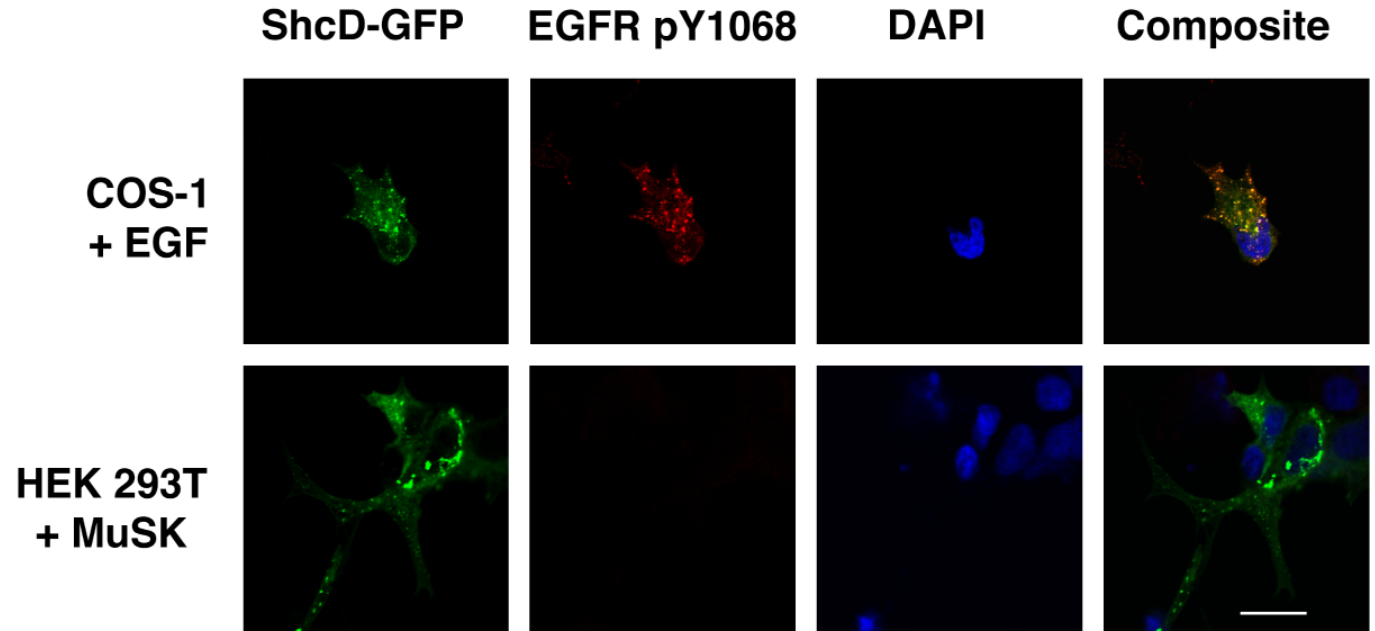

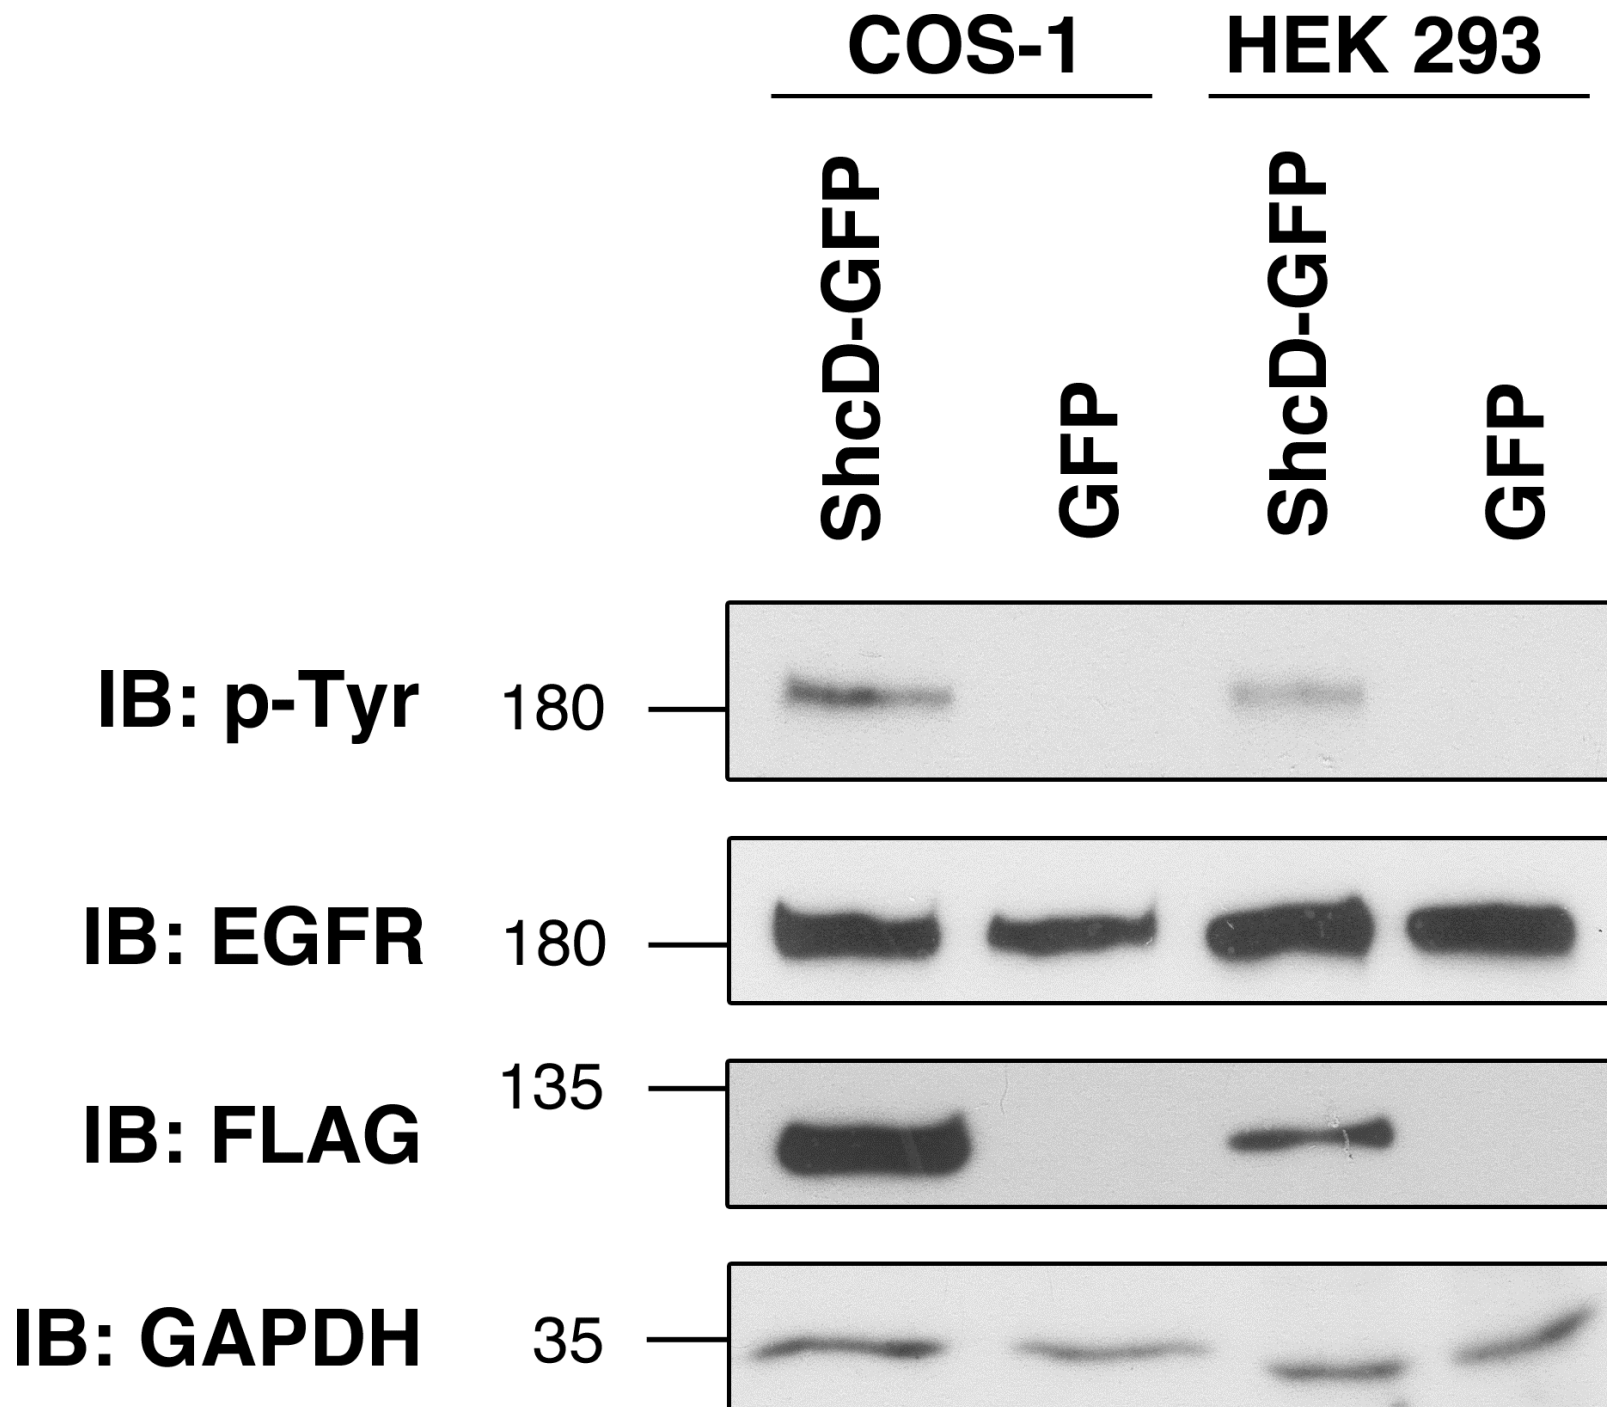

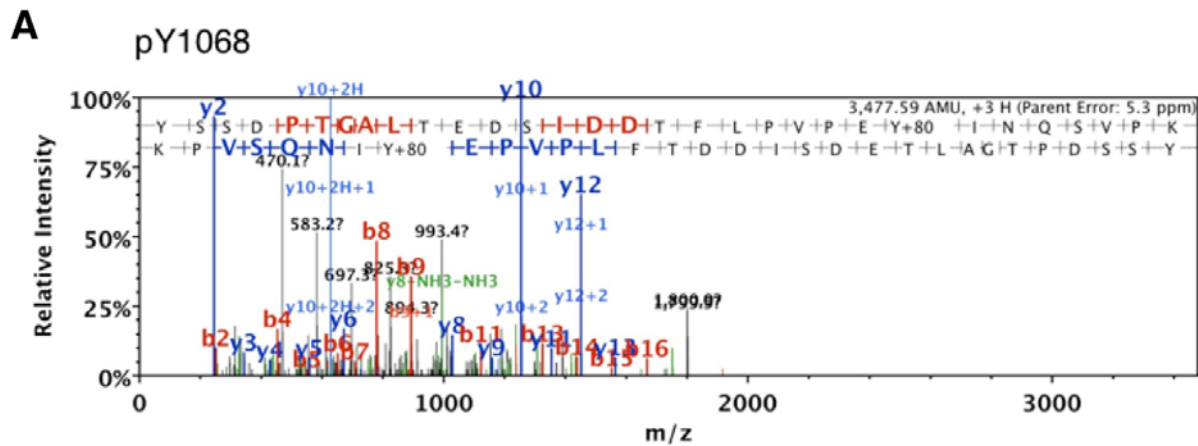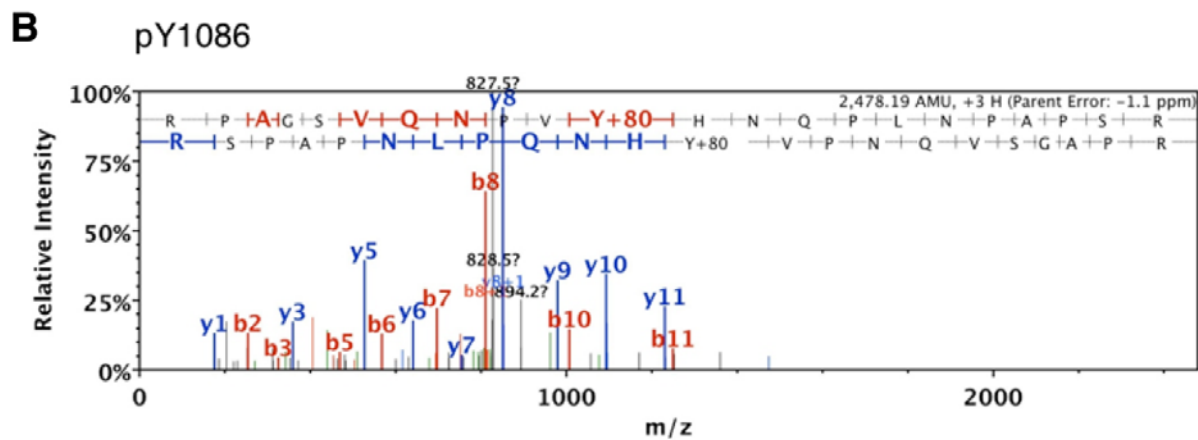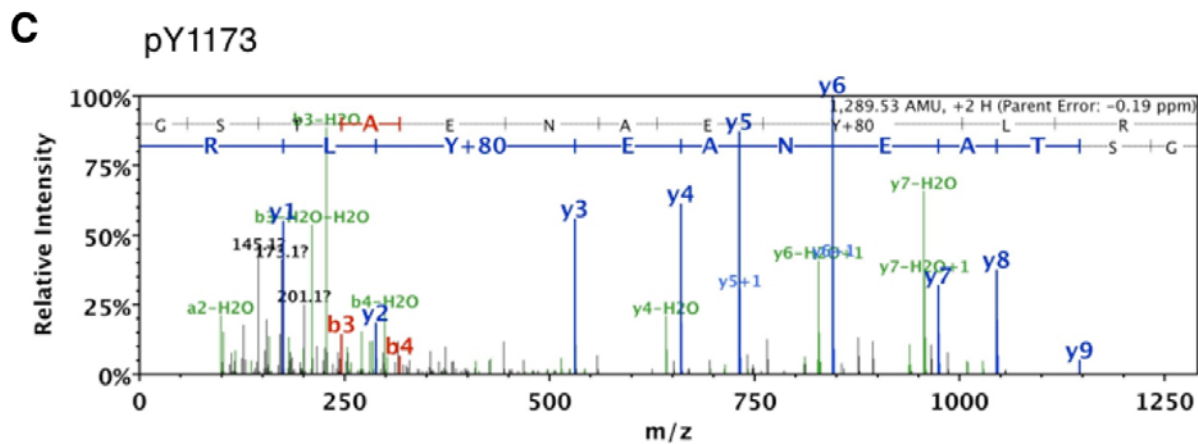

Supplement: supp_E13-08-0434_CombinedSupMats.pdf.pdf [file supp_E13-08-0434_CombinedSupMats.pdf.pdf]
